# Supplementary material for: Metabolically normal obese people are protected from adverse effects following weight gain
Source: JCI journal article supplement (doi:10.1172/jci78425), 2015-01-01
Supplement: sd2 [file 2]

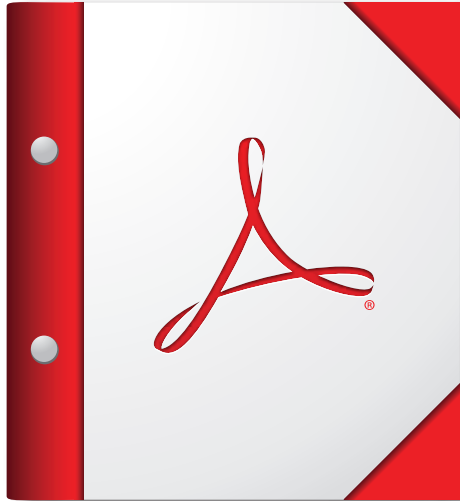

**For the best experience, open this PDF portfolio in  
Acrobat 9 or Adobe Reader 9, or later.**

[Get Adobe Reader Now!](#)
